# Supplementary material for: Switching of easy-axis to easy-plane anisotropy in cobalt(ii) complexes
Source: Royal Society of Chemistry journal article supplement (doi:10.1039/d1qi01208h), 2021-01-01
Supplement: d1qi01208h1.pdf [file d1qi01208h1.pdf]

## Supporting Information

### Switching of easy-axis to easy-plane anisotropy in cobalt(II) complexes

Yuewei Wu,<sup>a†</sup> Jing Xi,<sup>a†</sup> Tongtong Xiao,<sup>c</sup> Jesús Ferrando-Soria,<sup>b</sup> Zhongwen Ouyang,<sup>c</sup>  
Zhenxing Wang,<sup>\*c</sup> Shuchang Luo,<sup>d</sup> Xiangyu Liu,<sup>\*a,c</sup> and Emilio Pardo<sup>\*b</sup>

<sup>a</sup> State Key Laboratory of High-efficiency Utilization of Coal and Green Chemical Engineering, College of Chemistry and Chemical Engineering, Ningxia University, Yinchuan 750021, China.

<sup>b</sup> Departamento de Química Inorgánica, Instituto de Ciencia Molecular (ICMOL), Universidad de Valencia, Paterna 46980, Valencia, Spain.

<sup>c</sup> Wuhan National High Magnetic Field Center & School of Physics, Huazhong University of Science and Technology, Wuhan, 430074, China.

<sup>d</sup> College of Chemical Engineering, Guizhou University of Engineering Science, Bijie 551700,

<sup>e</sup> China State Key Laboratory of Coordination Chemistry, Nanjing University, Nanjing, 210023, China

† These authors contributed equally to this work.

\*Corresponding author

Dr. Prof. Xiangyu Liu

E-mail: xiangyuliu432@126.com

\*Corresponding author

Dr. Prof. Emilio Pardo

E-mail: emilio.pardo@uv.es

\*Corresponding author

Prof. Zhenxing Wang

E-mail: zxwang@hust.edu.cn

**Table of contents**

**Table S1** Crystal Data and Structure Refinement Details for **1-5**

**Table S2** Selected Bond Lengths (Å) and Bond Angles (°) for **1**

**Table S3** Selected Bond Lengths (Å) and Bond Angles (°) for **2**

**Table S4** Selected Bond Lengths (Å) and Bond Angles (°) for **3**

**Table S5** Selected Bond Lengths (Å) and Bond Angles (°) for **4**

**Table S6** Selected Bond Lengths (Å) and Bond Angles (°) for **5**

**Table S7** Co<sup>II</sup> ion geometry analysis of **1** by SHAPE 2.1 software

**Table S8** Co<sup>II</sup> ion geometry analysis of **2-5** by SHAPE 2.1 software

**Table S9** Fitted *D*, *E*, and *g* value for complexes **2-5**

**Table S10** Relaxation fitting parameters from least-squares fitting of  $\chi(f)$  data under 2000 Oe dc field of **1**

**Table S11** Relaxation fitting parameters from least-squares fitting of  $\chi(f)$  data under 2000 Oe dc field of **2**

**Table S12** Relaxation fitting parameters from least-squares fitting of  $\chi(f)$  data under 2000 Oe dc field of **3**

**Table S13** Relaxation fitting parameters from least-squares fitting of  $\chi(f)$  data under 2000 Oe dc field of **4**

**Table S14** Relaxation fitting parameters from least-squares fitting of  $\chi(f)$  data under 2000 Oe dc field of **5**

**Table S15** The B3LYP/def2-TZVP calculated net Mulliken spin densities, the  $\langle S^2 \rangle$  values and relative energies of the high-spin (HS) and the broken-symmetry spin (BS) states for a molecular fragment [Co<sub>4</sub>] of **1**

**Table S16** The CASSCF/NEVPT2/def2-TZVP(-f) (Co and O atoms, def2-QZVP) computed Individual contributions to *D*-tensor for in complex **2**

**Table S17** The CASSCF/NEVPT2/def2-TZVP(-f) (Co and O atoms, def2-QZVP) computed Individual contributions to *D*-tensor for in complex **3**

**Table S18** The CASSCF/NEVPT2/def2-TZVP(-f) (Co and O atoms, def2-QZVP) computed Individual contributions to *D*-tensor for in complex **4**

**Table S19** The CASSCF/NEVPT2/def2-TZVP(-f) (Co and O atoms, def2-QZVP) computed Individual contributions to *D*-tensor for in complex **5**

**Table S20** Energy levels (cm<sup>-1</sup>) of ligand field multiplets in zero field derived from CASSCF /def2-TZVP(-f) (Co and O atoms, def2-QZVP) computed for complex **2**

**Table S21** Energy levels (cm<sup>-1</sup>) of ligand field multiplets in zero field derived from CASSCF /def2-TZVP(-f) (Co and O atoms, def2-QZVP) computed for complex **3**

**Table S22** Energy levels (cm<sup>-1</sup>) of ligand field multiplets in zero field derived from CASSCF /def2-TZVP(-f) (Co and O atoms, def2-QZVP) computed for complex **4**

**Table S23** Energy levels ( $\text{cm}^{-1}$ ) of ligand field multiplets in zero field derived from CASSCF /def2-TZVP(-f) (Co and O atoms, def2-QZVP) computed for complex **5**

**Table S24** Calculated energy levels ( $\text{cm}^{-1}$ ) and  $g$  ( $g_x$ ,  $g_y$ ,  $g_z$ ) tensors of the lowest Kramers doublets (KDs) for complexes 2-5 within ORCA/CASSCF+NEVPT2+SINGLE\_ANISO.

**Table S25** Mulliken atomic charges on the metal atoms and donor atoms in the ground state of complexes **2-5** calculated within CASSCF

**Fig. S1** PXRD patterns for complexes **1(a)**, **2(b)**, **3(c)**, **4(d)** and **5(e)**.

**Fig. S2** Plots of  $M$  vs  $H/T$  for **2-5** at different temperatures.

**Fig. S3** Ac magnetic susceptibility measurements for **1-5** in 0 Oe static field.

**Fig. S4** Temperature dependence of the in-phase ac susceptibilities at different frequencies with a dc field of 2000 Oe for complexes **1-5**.

**Fig. S5** Temperature dependence of the out-of-phase ac susceptibilities at different frequencies with a dc field of 2000 Oe for complexes **1-5**.

**Fig. S6** Frequency dependence of the in-phase ac susceptibility signals for complexes **1-5** under a 2000 Oe dc field.

**Fig. S7** B3LYP calculated spin density for the high spin state with the cutoff values of  $0.008 \text{ e} \cdot \text{a}_0^{-3}$  of complex **1**.

**Fig. S8** Calculated complete structure of complexes **2-5**.

**Table S1** Crystal Data and Structure Refinement Details for **1-5**

|                                          | <b>1</b>                                                                        | <b>2</b>                                                        | <b>3</b>                                                                       | <b>4</b>                                                                       | <b>5</b>                                                                       |
|------------------------------------------|---------------------------------------------------------------------------------|-----------------------------------------------------------------|--------------------------------------------------------------------------------|--------------------------------------------------------------------------------|--------------------------------------------------------------------------------|
| Empirical formula                        | C <sub>64</sub> H <sub>60</sub> Co <sub>4</sub> F <sub>12</sub> O <sub>16</sub> | C <sub>30</sub> H <sub>24</sub> CoF <sub>6</sub> O <sub>6</sub> | C <sub>38</sub> H <sub>24</sub> CoF <sub>6</sub> N <sub>2</sub> O <sub>4</sub> | C <sub>40</sub> H <sub>28</sub> CoF <sub>6</sub> N <sub>2</sub> O <sub>4</sub> | C <sub>40</sub> H <sub>28</sub> CoF <sub>6</sub> N <sub>2</sub> O <sub>4</sub> |
| Formula weight                           | 1548.84                                                                         | 653.42                                                          | 745.52                                                                         | 773.57                                                                         | 773.57                                                                         |
| Crystal system                           | monoclinic                                                                      | triclinic                                                       | triclinic                                                                      | triclinic                                                                      | monoclinic                                                                     |
| Space group                              | <i>P</i> 2 <sub>1</sub> / <i>c</i>                                              | <i>P</i> -1                                                     | <i>P</i> -1                                                                    | <i>P</i> -1                                                                    | <i>P</i> 2 <sub>1</sub> / <i>c</i>                                             |
| <i>a</i> (Å)                             | 18.650(3)                                                                       | 5.2383(6)                                                       | 11.2640(7)                                                                     | 9.8446(17)                                                                     | 17.8736(6)                                                                     |
| <i>b</i> (Å)                             | 19.130(3)                                                                       | 10.7061(13)                                                     | 11.3866(8)                                                                     | 10.4886(18)                                                                    | 12.7580(4)                                                                     |
| <i>c</i> (Å)                             | 18.079(3)                                                                       | 12.8155(17)                                                     | 13.4453(10)                                                                    | 17.502(2)                                                                      | 17.6747(7)                                                                     |
| $\alpha$ (°)                             | 90                                                                              | 109.816(12)                                                     | 70.958(7)                                                                      | 81.985(12)                                                                     | 90                                                                             |
| $\beta$ (°)                              | 93.562(15)                                                                      | 91.495(10)                                                      | 89.366(6)                                                                      | 79.972(13)                                                                     | 116.774(5)                                                                     |
| $\gamma$ (°)                             | 90                                                                              | 92.628(9)                                                       | 88.289(5)                                                                      | 70.659(16)                                                                     | 90                                                                             |
| <i>V</i> (Å <sup>3</sup> )               | 6437.7(18)                                                                      | 674.79(15)                                                      | 1629.4(2)                                                                      | 1672.6(5)                                                                      | 3598.3(3)                                                                      |
| <i>Z</i>                                 | 4                                                                               | 1                                                               | 2                                                                              | 2                                                                              | 4                                                                              |
| $\mu$ (mm <sup>-1</sup> )                | 1.115                                                                           | 5.768                                                           | 0.606                                                                          | 0.594                                                                          | 4.398                                                                          |
| Unique reflections                       | 11342                                                                           | 2340                                                            | 7569                                                                           | 7849                                                                           | 6294                                                                           |
| Observed reflections                     | 44581                                                                           | 3631                                                            | 14020                                                                          | 13236                                                                          | 12011                                                                          |
| <i>R</i> <sub>int</sub>                  | 0.0957                                                                          | 0.0920                                                          | 0.063                                                                          | 0.0594                                                                         | 0.0449                                                                         |
| Final <i>R</i> indices                   | <i>R</i> <sub>1</sub> = 0.0821                                                  | <i>R</i> <sub>1</sub> = 0.0728                                  | <i>R</i> <sub>1</sub> = 0.0757                                                 | <i>R</i> <sub>1</sub> = 0.0787                                                 | <i>R</i> <sub>1</sub> = 0.0735                                                 |
| [ <i>I</i> > 2σ( <i>I</i> )]             | <i>wR</i> <sub>2</sub> = 0.2895                                                 | <i>wR</i> <sub>2</sub> = 0.1739                                 | <i>wR</i> <sub>2</sub> = 0.1137                                                | <i>wR</i> <sub>2</sub> = 0.1582                                                | <i>wR</i> <sub>2</sub> = 0.1935                                                |
| Goodness-of-fit on <i>F</i> <sup>2</sup> | 1.046                                                                           | 1.024                                                           | 1.031                                                                          | 1.048                                                                          | 1.033                                                                          |

**Table S2** Selected Bond Lengths (Å) and Bond Angles (°) for **1**.

| <b>1</b>    |          |                   |         |
|-------------|----------|-------------------|---------|
| Co(1)-O(6)  | 2.055(6) | O(6)-Co(1)-O(8)   | 85.1(2) |
| Co(1)-O(8)  | 2.062(6) | O(6)-Co(1)-O(B)   | 89.7(2) |
| Co(1)-O(B)  | 2.186(6) | O(6)-Co(1)-O(15)  | 81.6(2) |
| Co(1)-O(13) | 2.045(6) | O(8)-Co(1)-O(B)   | 90.8(2) |
| Co(1)-O(14) | 2.018(6) | O(8)-Co(1)-O(15)  | 82.3(2) |
| Co(1)-O(15) | 2.135(6) | O(13)-Co(1)-O(15) | 93.5(2) |
| Co(2)-O(1)  | 2.025(6) | O(2)-Co(2)-O(6)   | 92.0(3) |
| Co(2)-O(2)  | 2.036(6) | O(2)-Co(2)-O(3)   | 95.9(3) |
| Co(2)-O(3)  | 2.196(6) | O(1)-Co(2)-O(3)   | 91.3(2) |
| Co(2)-O(6)  | 2.078(6) | O(1)-Co(2)-O(7)   | 95.1(3) |
| Co(2)-O(7)  | 2.049(6) | O(3)-Co(2)-O(7)   | 89.0(2) |
| Co(2)-O(8)  | 2.131(6) | O(7)-Co(2)-O(8)   | 81.7(2) |
| Co(3)-O(4)  | 2.039(7) | O(4)-Co(3)-O(7)   | 93.2(3) |
| Co(3)-O(5)  | 2.022(6) | O(4)-Co(3)-O(9)   | 95.1(3) |
| Co(3)-O(6)  | 2.158(7) | O(5)-Co(3)-O(9)   | 88.5(3) |
| Co(3)-O(7)  | 2.054(6) | O(5)-Co(3)-O(6)   | 98.6(3) |
| Co(3)-O(9)  | 2.209(6) | O(7)-Co(3)-O(15)  | 84.3(2) |
| Co(3)-O(15) | 2.043(6) | O(9)-Co(3)-O(15)  | 90.3(2) |
| Co(4)-O(7)  | 2.129(6) | O(7)-Co(4)-O(8)   | 81.8(2) |
| Co(4)-O(8)  | 2.046(6) | O(7)-Co(4)-O(15)  | 82.2(2) |
| Co(4)-O(10) | 2.050(6) | O(10)-Co(4)-O(12) | 94.2(2) |
| Co(4)-O(11) | 2.024(6) | O(10)-Co(4)-O(15) | 92.0(2) |
| Co(4)-O(12) | 2.173(6) | O(11)-Co(4)-O(12) | 89.7(3) |
| Co(4)-O(15) | 2.056(6) | O(12)-Co(4)-O(15) | 92.2(2) |

**Table S3** Selected Bond Lengths (Å) and Bond Angles (°) for **2**

| <b>2</b>          |           |                     |           |
|-------------------|-----------|---------------------|-----------|
| Co(1)-O(1)        | 2.036(4)  | O(1)-Co(1)-O(3)#1   | 88.39(16) |
| Co(1)-O(1)#1      | 2.036(4)  | O(1)#1-Co(1)-O(3)#1 | 91.61(16) |
| Co(1)-O(2)        | 2.048(4)  | O(1)#1-Co(1)-O(3)   | 88.39(16) |
| Co(1)-O(2)#1      | 2.261(4)  | O(2)-Co(1)-O(3)#1   | 90.10(15) |
| Co(1)-O(3)        | 2.129(4)  | O(2)#1-Co(1)-O(3)   | 90.10(15) |
| Co(1)-O(3)#1      | 2.129(4)  | O(2)-Co(1)-O(2)#1   | 180       |
| O(1)-Co(1)-O(1)#1 | 180       | O(2)-Co(1)-O(3)     | 89.90(15) |
| O(1)-Co(1)-O(2)   | 90.65(15) | O(2)#1-Co(1)-O(1)#1 | 90.65(15) |
| O(1)-Co(1)-O(2)#1 | 89.35(15) | O(2)#1-Co(1)-O(2)   | 89.35(15) |
| O(1)-Co(1)-O(3)   | 91.61(16) | O(3)-Co(1)-O(3)#1   | 180       |
| #1 1-x, -y, -z    |           |                     |           |

**Table S4** Selected Bond Lengths (Å) and Bond Angles (°) for **3**

| <b>3</b>        |           |                 |            |
|-----------------|-----------|-----------------|------------|
| Co(1)-O(1)      | 2.055(2)  | O(1)-Co(1)-O(5) | 90.58(11)  |
| Co(1)-O(2)      | 2.063(3)  | O(5)-Co(1)-O(6) | 86.83(12)  |
| Co(1)-O(5)      | 2.051(3)  | O(5)-Co(1)-N(1) | 97.94(11)  |
| Co(1)-O(6)      | 2.059(3)  | O(5)-Co(1)-N(2) | 82.70(13)  |
| Co(1)-N(1)      | 2.118(3)  | N(1)-Co(1)-N(2) | 76.89(13)  |
| Co(1)-N(2)      | 2.117(4)  | N(2)-Co(1)-O(1) | 94.32(12)  |
| O(1)-Co(1)-O(2) | 87.92(10) | O(2)-Co(1)-O(6) | 93.18(11)  |
| N(1)-Co(1)-O(2) | 83.57(11) | N(1)-Co(1)-O(6) | 93.97(12)  |
| N(2)-Co(1)-O(2) | 97.58(12) | O(2)-Co(1)-O(5) | 178.49(10) |
| O(1)-Co(1)-O(6) | 96.58(11) | N(2)-Co(1)-O(6) | 164.94(12) |

**Table S5** Selected Bond Lengths (Å) and Bond Angles (°) for **4**

| <b>4</b>        |            |                 |            |
|-----------------|------------|-----------------|------------|
| Co(1)-O(1)      | 2.033(3)   | O(1)-Co(1)-N(2) | 94.19(13)  |
| Co(1)-O(2)      | 2.115(3)   | O(2)-Co(1)-N(1) | 175.36(13) |
| Co(1)-O(3)      | 2.059(3)   | O(2)-Co(1)-N(2) | 100.40(12) |
| Co(1)-O(4)      | 2.085(3)   | O(3)-Co(1)-O(2) | 88.38(12)  |
| Co(1)-N(1)      | 2.143(3)   | O(3)-Co(1)-O(4) | 86.71(12)  |
| Co(1)-N(2)      | 2.150(3)   | O(3)-Co(1)-N(1) | 87.63(13)  |
| O(1)-Co(1)-O(2) | 88.34(12)  | O(3)-Co(1)-N(2) | 92.66(13)  |
| O(1)-Co(1)-O(3) | 172.84(11) | O(4)-Co(1)-O(2) | 80.24(11)  |
| O(1)-Co(1)-O(4) | 86.46(12)  | O(4)-Co(1)-N(1) | 101.88(12) |
| O(1)-Co(1)-N(1) | 95.89(13)  | N(1)-Co(1)-N(2) | 77.44(12)  |

**Table S6** Selected Bond Lengths (Å) and Bond Angles (°) for **5**

| <b>5</b>        |           |                 |            |
|-----------------|-----------|-----------------|------------|
| Co(1)-O(1)      | 2.055(4)  | O(1)-Co(1)-N(2) | 174.02(14) |
| Co(1)-O(2)      | 2.069(4)  | O(2)-Co(1)-O(4) | 170.46(14) |
| Co(1)-O(3)      | 2.060(3)  | O(2)-Co(1)-N(1) | 96.12(16)  |
| Co(1)-O(4)      | 2.071(3)  | O(2)-Co(1)-N(2) | 92.98(15)  |
| Co(1)-N(1)      | 2.097(4)  | O(3)-Co(1)-O(2) | 88.46(14)  |
| Co(1)-N(2)      | 2.106(4)  | O(3)-Co(1)-O(4) | 87.62(13)  |
| O(1)-Co(1)-O(2) | 85.87(14) | O(3)-Co(1)-N(1) | 172.22(17) |
| O(1)-Co(1)-O(3) | 89.84(14) | O(3)-Co(1)-N(2) | 96.00(15)  |
| O(1)-Co(1)-O(4) | 85.43(14) | O(4)-Co(1)-N(1) | 88.78(15)  |
| O(1)-Co(1)-N(1) | 96.74(16) | N(1)-Co(1)-N(2) | 77.53(17)  |

**Table S7** Co<sup>II</sup> ion geometry analysis of **1** by SHAPE 2.1 software

| Configuration | ABOXIY, 1(Co1) | ABOXIY, 1(Co2) | ABOXIY, 1(Co3) | ABOXIY, 1(Co4) |
|---------------|----------------|----------------|----------------|----------------|
| OC-6          | 0.445          | 0.448          | 0.533          | 0.417          |
| TPR-6         | 14.975         | 14.850         | 14.654         | 15.418         |
| JPPY-6        | 30.580         | 30.551         | 30.069         | 30.805         |

**Table S8** Co<sup>II</sup> ion geometry analysis of **2-5** by SHAPE 2.1 software

| Configuration | ABOXIY, 2 | ABOXIY, 3 | ABOXIY, 4 | ABOXIY, 5 |
|---------------|-----------|-----------|-----------|-----------|
| OC-6          | 0.057     | 1.030     | 0.857     | 0.698     |
| TPR-6         | 16.501    | 11.429    | 15.141    | 13.371    |
| JPPY-6        | 33.140    | 26.937    | 29.656    | 28.689    |

**Table S9** Fitted *D*, *E*, and *g* value for complexes **2-5**

| Complex  | <i>D</i> (cm <sup>-1</sup> ) | <i>E</i> (cm <sup>-1</sup> ) | <i>g</i> <sub>x,y</sub> | <i>g</i> <sub>z</sub> | <i>R</i>                |
|----------|------------------------------|------------------------------|-------------------------|-----------------------|-------------------------|
| <b>2</b> | -60.48                       | -9.559                       | 3.56                    | 2.20                  | 5.35 × 10 <sup>-4</sup> |
| <b>3</b> | 70.77                        | 9.898                        | 2.21                    | 2.16                  | 8.96 × 10 <sup>-4</sup> |
| <b>4</b> | 35.71                        | 13.470                       | 2.14                    | 2.12                  | 3.64 × 10 <sup>-4</sup> |
| <b>5</b> | 51.28                        | 6.386                        | 2.57                    | 2.56                  | 6.28 × 10 <sup>-4</sup> |

**Table S10** Relaxation fitting parameters from least-squares fitting of  $\chi(f)$  data under 2000 Oe dc field of **1**

| <i>T</i> (K) | $\chi_T$ | $\chi_S$ | $\alpha$ |
|--------------|----------|----------|----------|
| 2            | 0.849    | 0.024    | 0.180    |
| 2.25         | 0.807    | 0.026    | 0.177    |
| 2.5          | 0.769    | 0.027    | 0.173    |
| 2.75         | 0.734    | 0.027    | 0.170    |
| 3            | 0.692    | 0.027    | 0.164    |
| 3.25         | 0.641    | 0.031    | 0.156    |
| 3.5          | 0.602    | 0.028    | 0.150    |
| 3.75         | 0.564    | 0.023    | 0.145    |
| 4            | 0.532    | 0.024    | 0.138    |
| 4.25         | 0.501    | 0.025    | 0.131    |
| 4.5          | 0.473    | 0.026    | 0.125    |
| 4.75         | 0.436    | 0.024    | 0.118    |
| 5            | 0.397    | 0.026    | 0.111    |
| 5.25         | 0.349    | 0.027    | 0.102    |
| 5.5          | 0.306    | 0.027    | 0.101    |
| 5.75         | 0.264    | 0.029    | 0.101    |
| 6            | 0.232    | 0.030    | 0.101    |

**Table S11** Relaxation fitting parameters from least-squares fitting of  $\chi(f)$  data under 2000 Oe dc field of **2**

| $T(K)$ | $\chi_T$ | $\chi_s$ | $\alpha$ |
|--------|----------|----------|----------|
| 2      | 0.444    | 0.072    | 0.344    |
| 2.1    | 0.436    | 0.067    | 0.349    |
| 2.2    | 0.422    | 0.066    | 0.337    |
| 2.3    | 0.422    | 0.071    | 0.338    |
| 2.4    | 0.394    | 0.071    | 0.289    |
| 2.5    | 0.383    | 0.066    | 0.290    |
| 2.6    | 0.370    | 0.070    | 0.257    |
| 2.7    | 0.359    | 0.71     | 0.236    |
| 2.8    | 0.345    | 0.075    | 0.197    |
| 2.9    | 0.335    | 0.071    | 0.194    |
| 3      | 0.336    | 0.064    | 0.215    |
| 3.1    | 0.327    | 0.062    | 0.202    |
| 3.2    | 0.316    | 0.060    | 0.187    |
| 3.3    | 0.304    | 0.064    | 0.147    |
| 3.4    | 0.294    | 0.065    | 0.115    |
| 3.5    | 0.289    | 0.060    | 0.117    |
| 3.6    | 0.285    | 0.052    | 0.130    |
| 3.7    | 0.276    | 0.053    | 0.099    |
| 3.8    | 0.269    | 0.049    | 0.090    |
| 3.9    | 0.264    | 0.049    | 0.073    |
| 4      | 0.259    | 0.040    | 0.080    |
| 4.2    | 0.248    | 0.031    | 0.064    |
| 4.4    | 0.238    | 0.015    | 0.060    |
| 4.6    | 0.229    | 0.004    | 0.047    |
| 4.8    | 0.220    | 0.002    | 0.032    |
| 5      | 0.212    | 0.001    | 0.012    |

**Table S12** Relaxation fitting parameters from least-squares fitting of  $\chi(f)$  data under 2000 Oe dc field of **3**

| $T(K)$ | $\chi_T$ | $\chi_s$ | $\alpha$ |
|--------|----------|----------|----------|
| 2      | 0.032    | 0.532    | 0.006    |
| 2.25   | 0.031    | 0.528    | 0.006    |
| 2.5    | 0.030    | 0.523    | 0.007    |
| 2.75   | 0.030    | 0.509    | 0.010    |
| 3      | 0.031    | 0.495    | 0.008    |
| 3.25   | 0.029    | 0.469    | 0.009    |
| 3.5    | 0.028    | 0.445    | 0.009    |
| 3.75   | 0.028    | 0.419    | 0.014    |
| 4      | 0.029    | 0.400    | 0.012    |
| 4.25   | 0.023    | 0.384    | 0.013    |
| 4.5    | 0.024    | 0.364    | 0.011    |
| 4.75   | 0.023    | 0.328    | 0.008    |
| 5      | 0.027    | 0.305    | 0.008    |
| 5.25   | 0.026    | 0.269    | 0.007    |
| 5.5    | 0.024    | 0.231    | 0.006    |



**Table S13** Relaxation fitting parameters from least-squares fitting of  $\chi(f)$  data under 2000 Oe dc field of **4**

| $T(K)$ | $\chi_T$ | $\chi_s$ | $\alpha$ |
|--------|----------|----------|----------|
| 2      | 0.364    | 0.002    | 0.123    |
| 2.1    | 0.353    | 0.003    | 0.115    |
| 2.2    | 0.344    | 0.004    | 0.114    |
| 2.3    | 0.336    | 0.006    | 0.112    |
| 2.4    | 0.323    | 0.001    | 0.093    |
| 2.5    | 0.316    | 0.002    | 0.093    |
| 2.6    | 0.307    | 0.003    | 0.084    |
| 2.7    | 0.299    | 0.003    | 0.081    |
| 2.8    | 0.292    | 0.004    | 0.080    |
| 2.9    | 0.286    | 0.006    | 0.081    |
| 3      | 0.277    | 0.008    | 0.068    |
| 3.1    | 0.269    | 0.002    | 0.061    |
| 3.2    | 0.263    | 0.002    | 0.058    |
| 3.3    | 0.254    | 0.003    | 0.053    |
| 3.4    | 0.249    | 0.007    | 0.050    |
| 3.5    | 0.244    | 0.008    | 0.047    |
| 3.6    | 0.238    | 0.001    | 0.044    |
| 3.7    | 0.232    | 0.001    | 0.039    |
| 3.8    | 0.228    | 0.002    | 0.033    |
| 3.9    | 0.222    | 0.003    | 0.019    |
| 4      | 0.217    | 0.002    | 0.016    |

**Table S14** Relaxation fitting parameters from least-squares fitting of  $\chi(f)$  data under 2000 Oe dc field of **5**

| $T(K)$ | $\chi_T$ | $\chi_s$ | $\alpha$ |
|--------|----------|----------|----------|
| 2      | 0.397    | 0.006    | 0.265    |
| 2.5    | 0.327    | 0.002    | 0.202    |
| 3      | 0.282    | 0.002    | 0.161    |
| 3.3    | 0.259    | 0.004    | 0.134    |
| 3.6    | 0.239    | 0.007    | 0.108    |
| 4      | 0.218    | 0.001    | 0.077    |
| 4.3    | 0.204    | 0.002    | 0.068    |
| 4.6    | 0.192    | 0.003    | 0.059    |
| 5      | 0.177    | 0.006    | 0.052    |
| 5.3    | 0.168    | 0.002    | 0.045    |
| 5.6    | 0.160    | 0.003    | 0.039    |
| 6      | 0.150    | 0.002    | 0.033    |
| 6.5    | 0.139    | 0.002    | 0.027    |
| 7      | 0.129    | 0.003    | 0.015    |
| 7.5    | 0.121    | 0.004    | 0.013    |

**Table S15** The B3LYP/def2-TZVP calculated net Mulliken spin densities, the  $\langle S^2 \rangle$  values and relative energies of the high-spin (HS) and the broken-symmetry spin (BS) states for a molecular fragment [Co<sub>4</sub>] of **1**

| Spin states                            | $\Delta_i^a/\text{cm}^{-1}$ | $\langle S^2 \rangle$ | $\rho(\text{Co1})$ | $\rho(\text{Co2})$ | $\rho(\text{Co3})$ | $\rho(\text{Co4})$ |
|----------------------------------------|-----------------------------|-----------------------|--------------------|--------------------|--------------------|--------------------|
| HS, $ \alpha\alpha\alpha\alpha\rangle$ | 0                           | 42.0395               | 2.751              | 2.753              | 2.747              | 2.752              |
| BS1, $ \beta\alpha\alpha\alpha\rangle$ | 96.510                      | 15.0273               | -2.749             | 2.747              | 2.747              | 2.755              |
| BS2, $ \beta\alpha\alpha\beta\rangle$  | 101.934                     | 6.0238                | -2.755             | 2.747              | 2.750              | -2.745             |

**Table S16** The CASSCF/NEVPT2/def2-TZVP(-f) (Co and O atoms, def2-QZVP) computed Individual contributions to  $D$ -tensor for in complex **2**

| $2S+1$ | Root | $D$     | $E$    | $2S+1$ | Root | $D$    | $E$    |
|--------|------|---------|--------|--------|------|--------|--------|
| 4      | 0    | 0.000   | 0.000  | 2      | 15   | 1.168  | -0.011 |
| 4      | 1    | -13.045 | -4.620 | 2      | 16   | -0.646 | -0.453 |
| 4      | 2    | -29.746 | 0.094  | 2      | 17   | -0.220 | 0.332  |
| 4      | 3    | -8.838  | -0.004 | 2      | 18   | -0.386 | -0.063 |
| 4      | 4    | 0.047   | -0.026 | 2      | 19   | -0.576 | -0.441 |
| 4      | 5    | 3.238   | -1.314 | 2      | 20   | -0.218 | 0.207  |
| 4      | 6    | 0.016   | 0.002  | 2      | 21   | -0.613 | 0.157  |
| 4      | 7    | 0.086   | -0.027 | 2      | 22   | 0.319  | -0.009 |
| 4      | 8    | -0.005  | 0.001  | 2      | 23   | -0.038 | 0.041  |
| 4      | 9    | -0.024  | -0.001 | 2      | 24   | -0.253 | 0.155  |
| 2      | 0    | -11.425 | -4.708 | 2      | 25   | 0.011  | 0.002  |
| 2      | 1    | -1.315  | -0.410 | 2      | 26   | -0.025 | 0.024  |
| 2      | 2    | -0.025  | 0.008  | 2      | 27   | -0.076 | -0.044 |
| 2      | 3    | 0.009   | 0.002  | 2      | 28   | 0.000  | 0.000  |
| 2      | 4    | 1.796   | -0.002 | 2      | 29   | 0.005  | -0.001 |
| 2      | 5    | -1.060  | 0.356  | 2      | 30   | 0.220  | 0.002  |
| 2      | 6    | -0.017  | 0.013  | 2      | 31   | -0.030 | -0.019 |
| 2      | 7    | 0.005   | -0.003 | 2      | 32   | -0.040 | 0.037  |
| 2      | 8    | 0.884   | -0.000 | 2      | 33   | 0.080  | -0.000 |
| 2      | 9    | 0.186   | -0.000 | 2      | 34   | -0.003 | -0.003 |
| 2      | 10   | -0.067  | 0.026  | 2      | 35   | 0.000  | 0.000  |
| 2      | 11   | -1.018  | -0.495 | 2      | 36   | -0.011 | -0.002 |
| 2      | 12   | 0.070   | -0.009 | 2      | 37   | 0.000  | 0.000  |
| 2      | 13   | 0.168   | -0.001 | 2      | 38   | -0.004 | -0.002 |
| 2      | 14   | 0.000   | 0.000  | 2      | 39   | -0.071 | -0.024 |

**Table S17** The CASSCF/NEVPT2/def2-TZVP(-f) (Co, N and O atoms, def2-QZVP) computed Individual contributions to  $D$ -tensor for in complex **3**

| $2S+1$ | Root | $D$     | $E$     | $2S+1$ | Root | $D$    | $E$    |
|--------|------|---------|---------|--------|------|--------|--------|
| 4      | 0    | -0.000  | 0.000   | 2      | 15   | -0.454 | 0.434  |
| 4      | 1    | 41.699  | 41.650  | 2      | 16   | -0.581 | -0.601 |
| 4      | 2    | 30.099  | -29.974 | 2      | 17   | -0.001 | -0.000 |
| 4      | 3    | -18.858 | 0.048   | 2      | 18   | -0.639 | 0.618  |
| 4      | 4    | 2.079   | -2.056  | 2      | 19   | -0.420 | -0.419 |
| 4      | 5    | 1.309   | 2.501   | 2      | 20   | -0.324 | 0.060  |
| 4      | 6    | 0.000   | 0.000   | 2      | 21   | -0.212 | 0.013  |
| 4      | 7    | 0.028   | -0.023  | 2      | 22   | 0.992  | -0.046 |
| 4      | 8    | 0.070   | 0.069   | 2      | 23   | -0.002 | -0.005 |
| 4      | 9    | 0.049   | -0.039  | 2      | 24   | 0.077  | -0.041 |
| 2      | 0    | -2.404  | 2.357   | 2      | 25   | -0.007 | -0.009 |
| 2      | 1    | -2.149  | -2.086  | 2      | 26   | -0.034 | -0.059 |
| 2      | 2    | -0.006  | 0.006   | 2      | 27   | -0.067 | 0.060  |
| 2      | 3    | -1.033  | -1.025  | 2      | 28   | 0.214  | -0.018 |
| 2      | 4    | -0.523  | 0.523   | 2      | 29   | -0.026 | 0.039  |
| 2      | 5    | -0.248  | -0.080  | 2      | 30   | 0.038  | -0.013 |
| 2      | 6    | -0.644  | 0.629   | 2      | 31   | -0.010 | 0.009  |
| 2      | 7    | -0.027  | 0.003   | 2      | 32   | -0.041 | 0.034  |
| 2      | 8    | 3.117   | -0.000  | 2      | 33   | -0.055 | -0.049 |
| 2      | 9    | -0.045  | -0.025  | 2      | 34   | -0.001 | 0.001  |
| 2      | 10   | -0.049  | -0.010  | 2      | 35   | -0.034 | -0.035 |
| 2      | 11   | -0.036  | 0.035   | 2      | 36   | -0.019 | 0.012  |
| 2      | 12   | 0.822   | -0.000  | 2      | 37   | -0.012 | 0.007  |
| 2      | 13   | -0.020  | 0.016   | 2      | 38   | -0.000 | 0.000  |
| 2      | 14   | 0.012   | -0.013  | 2      | 39   | -0.027 | 0.022  |

**Table S18** The CASSCF/NEVPT2/def2-TZVP(-f) (Co, N and O atoms, def2-QZVP) computed Individual contributions to  $D$ -tensor for in complex 4

| $2S+1$ | Root | $D$    | $E$     | $2S+1$ | Root | $D$    | $E$    |
|--------|------|--------|---------|--------|------|--------|--------|
| 4      | 0    | 0.000  | 0.000   | 2      | 15   | -0.392 | 0.330  |
| 4      | 1    | 21.500 | 20.283  | 2      | 16   | -0.237 | -0.372 |
| 4      | 2    | 15.673 | -15.177 | 2      | 17   | -0.010 | 0.010  |
| 4      | 3    | -7.536 | 0.307   | 2      | 18   | -0.868 | 0.902  |
| 4      | 4    | 0.340  | 1.035   | 2      | 19   | 0.395  | -0.002 |
| 4      | 5    | 2.241  | 1.973   | 2      | 20   | 1.015  | -0.004 |
| 4      | 6    | 0.010  | -0.010  | 2      | 21   | -0.189 | -0.267 |
| 4      | 7    | 0.079  | -0.074  | 2      | 22   | -0.014 | 0.010  |
| 4      | 8    | 0.107  | 0.102   | 2      | 23   | -0.035 | 0.035  |
| 4      | 9    | 0.012  | -0.010  | 2      | 24   | -0.225 | -0.217 |
| 2      | 0    | -4.750 | 5.964   | 2      | 25   | 0.004  | -0.005 |
| 2      | 1    | 2.984  | 0.633   | 2      | 26   | -0.113 | 0.114  |
| 2      | 2    | -0.014 | -0.012  | 2      | 27   | 0.006  | -0.001 |
| 2      | 3    | -1.073 | -1.075  | 2      | 28   | -0.090 | -0.091 |
| 2      | 4    | -0.089 | 0.034   | 2      | 29   | -0.006 | 0.005  |
| 2      | 5    | -0.839 | 0.868   | 2      | 30   | 0.157  | -0.013 |
| 2      | 6    | -0.085 | 0.089   | 2      | 31   | -0.042 | 0.038  |
| 2      | 7    | -0.344 | 0.292   | 2      | 32   | -0.023 | 0.023  |
| 2      | 8    | -0.234 | -0.206  | 2      | 33   | -0.005 | 0.005  |
| 2      | 9    | -0.007 | -0.001  | 2      | 34   | -0.036 | -0.036 |
| 2      | 10   | -0.087 | 0.083   | 2      | 35   | 0.031  | 0.005  |
| 2      | 11   | 3.115  | 0.008   | 2      | 36   | -0.012 | 0.019  |
| 2      | 12   | 0.093  | -0.049  | 2      | 37   | 0.002  | 0.012  |
| 2      | 13   | -0.221 | -0.284  | 2      | 38   | -0.025 | 0.024  |
| 2      | 14   | -0.022 | -0.004  | 2      | 39   | -0.005 | 0.005  |

**Table S19** The CASSCF/NEVPT2/def2-TZVP(-f) (Co, N and O atoms, def2-QZVP) computed Individual contributions to  $D$ -tensor for in complex **5**

| $2S+1$ | Root | $D$     | $E$     | $2S+1$ | Root | $D$    | $E$    |
|--------|------|---------|---------|--------|------|--------|--------|
| 4      | 0    | 0.000   | 0.000   | 2      | 15   | -0.195 | 0.204  |
| 4      | 1    | 24.480  | 24.566  | 2      | 16   | -0.220 | 0.220  |
| 4      | 2    | 22.301  | -22.254 | 2      | 17   | -0.262 | -0.329 |
| 4      | 3    | -13.121 | -0.023  | 2      | 18   | -0.061 | 0.029  |
| 4      | 4    | 3.413   | 3.484   | 2      | 19   | -0.900 | 0.907  |
| 4      | 5    | 0.897   | 0.802   | 2      | 20   | 0.175  | -0.064 |
| 4      | 6    | 0.004   | -0.004  | 2      | 21   | 0.767  | -0.166 |
| 4      | 7    | 0.050   | -0.047  | 2      | 22   | -0.094 | 0.071  |
| 4      | 8    | 0.084   | 0.058   | 2      | 23   | 0.025  | -0.250 |
| 4      | 9    | 0.037   | 0.001   | 2      | 24   | -0.007 | 0.006  |
| 2      | 0    | 1.566   | -0.024  | 2      | 25   | -0.152 | -0.221 |
| 2      | 1    | -4.006  | 3.832   | 2      | 26   | -0.133 | 0.133  |
| 2      | 2    | -0.019  | -0.016  | 2      | 27   | 0.009  | -0.001 |
| 2      | 3    | -0.470  | -0.462  | 2      | 28   | -0.048 | 0.045  |
| 2      | 4    | -0.487  | -0.388  | 2      | 29   | -0.038 | -0.078 |
| 2      | 5    | -0.611  | -0.141  | 2      | 30   | 0.219  | -0.032 |
| 2      | 6    | -1.153  | 1.102   | 2      | 31   | -0.019 | 0.002  |
| 2      | 7    | 0.016   | -0.010  | 2      | 32   | -0.005 | 0.002  |
| 2      | 8    | 3.430   | 0.003   | 2      | 33   | -0.069 | 0.066  |
| 2      | 9    | -0.012  | 0.012   | 2      | 34   | -0.054 | -0.053 |
| 2      | 10   | -0.084  | -0.085  | 2      | 35   | 0.000  | -0.000 |
| 2      | 11   | -0.071  | 0.070   | 2      | 36   | 0.003  | 0.011  |
| 2      | 12   | 0.484   | -0.094  | 2      | 37   | 0.003  | 0.011  |
| 2      | 13   | -0.287  | -0.286  | 2      | 38   | -0.001 | 0.000  |
| 2      | 14   | 24.480  | 24.566  | 2      | 39   | -0.039 | 0.042  |

**Table S20** Energy levels (cm<sup>-1</sup>) of ligand field multiplets in zero field derived from CASSCF/def2-TZVP(-f) (Co and O atoms, def2-QZVP) computed for complex **2**

| KDs | <i>E</i> /cm <sup>-1</sup> |
|-----|----------------------------|-----|----------------------------|-----|----------------------------|-----|----------------------------|
| 1   | 0.0                        | 31  | 17259.9                    | 61  | 29290.1                    | 91  | 43415.0                    |
| 2   | 70.6                       | 32  | 19120.4                    | 62  | 30113.2                    | 92  | 43844.4                    |
| 3   | 70.6                       | 33  | 19120.4                    | 63  | 30113.2                    | 93  | 43844.4                    |
| 4   | 2020.9                     | 34  | 19713.8                    | 64  | 30187.5                    | 94  | 44370.4                    |
| 5   | 2020.9                     | 35  | 19713.8                    | 65  | 30187.5                    | 95  | 44370.4                    |
| 6   | 2141.7                     | 36  | 20339.0                    | 66  | 32262.4                    | 96  | 44679.4                    |
| 7   | 2141.7                     | 37  | 20339.0                    | 67  | 32262.4                    | 97  | 44679.4                    |
| 8   | 3080.1                     | 38  | 21860.3                    | 68  | 32524.6                    | 98  | 45153.8                    |
| 9   | 3080.1                     | 39  | 21860.3                    | 69  | 32524.6                    | 99  | 45153.8                    |
| 10  | 3245.3                     | 40  | 22190.3                    | 70  | 33026.0                    | 100 | 42918.3                    |
| 11  | 3245.3                     | 41  | 22190.3                    | 71  | 33026.0                    | 101 | 42918.3                    |
| 12  | 5293.1                     | 42  | 23069.4                    | 72  | 33334.5                    | 102 | 45974.4                    |
| 13  | 5293.1                     | 43  | 23069.4                    | 73  | 33334.5                    | 103 | 45974.4                    |
| 14  | 10752.3                    | 44  | 23517.7                    | 74  | 33541.8                    | 104 | 46620.5                    |
| 15  | 10752.3                    | 45  | 23517.7                    | 75  | 33541.8                    | 105 | 46620.5                    |
| 16  | 10800.0                    | 46  | 23777.2                    | 76  | 35702.8                    | 106 | 46782.9                    |
| 17  | 10800.0                    | 47  | 23777.2                    | 77  | 35702.8                    | 107 | 46782.9                    |
| 18  | 10876.2                    | 48  | 24104.5                    | 78  | 36394.2                    | 108 | 47348.7                    |
| 19  | 10876.2                    | 49  | 24104.5                    | 79  | 36394.2                    | 109 | 47348.7                    |
| 20  | 13365.8                    | 50  | 26742.2                    | 80  | 37862.4                    | 110 | 65209.8                    |
| 21  | 13365.8                    | 51  | 26742.2                    | 81  | 37862.4                    | 111 | 65209.8                    |
| 22  | 13464.3                    | 52  | 26807.6                    | 82  | 38478.8                    | 112 | 65974.8                    |
| 23  | 13464.3                    | 53  | 26807.6                    | 83  | 38478.8                    | 113 | 65974.8                    |
| 24  | 15517.3                    | 54  | 26903.1                    | 84  | 38958.3                    | 114 | 67244.8                    |
| 25  | 15517.3                    | 55  | 26903.1                    | 85  | 38958.3                    | 115 | 67244.8                    |
| 26  | 16191.0                    | 56  | 26919.4                    | 86  | 40011.2                    | 116 | 67638.8                    |
| 27  | 16191.0                    | 57  | 26919.4                    | 87  | 40011.2                    | 117 | 67638.8                    |
| 28  | 16368.5                    | 58  | 28766.8                    | 88  | 41644.3                    | 118 | 68459.7                    |
| 29  | 16368.5                    | 59  | 28766.8                    | 89  | 41644.3                    | 119 | 68459.7                    |
| 30  | 17259.9                    | 60  | 29290.1                    | 90  | 43415.0                    |     |                            |

**Table S21** Energy levels ( $\text{cm}^{-1}$ ) of ligand field multiplets in zero field derived from CASSCF/def2-TZVP(-f) (Co, N and O atoms, def2-QZVP) computed for complex **3**

| KDs | $E/\text{cm}^{-1}$ | KDs | $E/\text{cm}^{-1}$ | KDs | $E/\text{cm}^{-1}$ | KDs | $E/\text{cm}^{-1}$ |
|-----|--------------------|-----|--------------------|-----|--------------------|-----|--------------------|
| 1   | 0.0                | 31  | 16327.9            | 61  | 26981.2            | 91  | 37380.5            |
| 2   | 161.0              | 32  | 20255.6            | 62  | 27405.7            | 92  | 37621.0            |
| 3   | 161.0              | 33  | 20255.6            | 63  | 27405.7            | 93  | 37621.0            |
| 4   | 709.3              | 34  | 20533.5            | 64  | 29700.1            | 94  | 38054.6            |
| 5   | 709.3              | 35  | 20533.5            | 65  | 29700.1            | 95  | 38054.6            |
| 6   | 1013.9             | 36  | 20931.0            | 66  | 30127.0            | 96  | 47841.1            |
| 7   | 1013.9             | 37  | 20931.0            | 67  | 30127.0            | 97  | 47841.1            |
| 8   | 1324.3             | 38  | 21154.1            | 68  | 30329.9            | 98  | 48290.5            |
| 9   | 1324.3             | 39  | 21154.1            | 69  | 30329.9            | 99  | 48290.5            |
| 10  | 1450.7             | 40  | 21328.8            | 70  | 30656.8            | 100 | 48397.2            |
| 11  | 1450.7             | 41  | 21328.8            | 71  | 30656.8            | 101 | 48397.2            |
| 12  | 7650.5             | 42  | 21474.9            | 72  | 30747.5            | 102 | 49366.9            |
| 13  | 7650.5             | 43  | 21474.9            | 73  | 30747.5            | 103 | 49366.9            |
| 14  | 7680.1             | 44  | 24284.0            | 74  | 30974.3            | 104 | 49523.4            |
| 15  | 7680.1             | 45  | 24284.0            | 75  | 30974.3            | 105 | 49523.4            |
| 16  | 7981.6             | 46  | 24349.7            | 76  | 32910.4            | 106 | 49850.1            |
| 17  | 7981.6             | 47  | 24349.7            | 77  | 32910.4            | 107 | 49850.1            |
| 18  | 8015.9             | 48  | 24765.0            | 78  | 33200.1            | 108 | 50342.6            |
| 19  | 8015.9             | 49  | 24765.0            | 79  | 33200.1            | 109 | 50342.6            |
| 20  | 8152.5             | 50  | 24838.1            | 80  | 35834.6            | 110 | 73665.7            |
| 21  | 8152.5             | 51  | 24838.1            | 81  | 35834.6            | 111 | 73665.7            |
| 22  | 8254.2             | 52  | 24968.3            | 82  | 36028.2            | 112 | 73939.9            |
| 23  | 8254.2             | 53  | 24968.3            | 83  | 36028.2            | 113 | 73939.9            |
| 24  | 14712.8            | 54  | 25306.0            | 84  | 36286.6            | 114 | 74279.6            |
| 25  | 14712.8            | 55  | 25306.0            | 85  | 36286.6            | 115 | 74279.6            |
| 26  | 14857.9            | 56  | 25917.1            | 86  | 37005.1            | 116 | 74506.4            |
| 27  | 14857.9            | 57  | 25917.1            | 87  | 37005.1            | 117 | 74506.4            |
| 28  | 16326.4            | 58  | 26871.4            | 88  | 37257.8            | 118 | 74843.2            |
| 29  | 16326.4            | 59  | 26871.4            | 89  | 37257.8            | 119 | 74843.2            |
| 30  | 16327.9            | 60  | 26981.2            | 90  | 37380.5            |     |                    |

**Table S22** Energy levels (cm<sup>-1</sup>) of ligand field multiplets in zero field derived from CASSCF/def2-TZVP(-f) (Co, N and O atoms, def2-QZVP) computed for complex **4**

| KDs | <i>E</i> /cm <sup>-1</sup> |
|-----|----------------------------|-----|----------------------------|-----|----------------------------|-----|----------------------------|
| 1   | 0.0                        | 31  | 18202.0                    | 61  | 27348.5                    | 91  | 42366.4                    |
| 2   | 83.4                       | 32  | 18715.5                    | 62  | 29098.1                    | 92  | 42756.6                    |
| 3   | 83.4                       | 33  | 18715.5                    | 63  | 29098.1                    | 93  | 42756.6                    |
| 4   | 1400.6                     | 34  | 19266.2                    | 64  | 30327.0                    | 94  | 43164.5                    |
| 5   | 1400.6                     | 35  | 19266.2                    | 65  | 30327.0                    | 95  | 43164.5                    |
| 6   | 1540.0                     | 36  | 19520.2                    | 66  | 30574.5                    | 96  | 43345.9                    |
| 7   | 1540.0                     | 37  | 19520.2                    | 67  | 30574.5                    | 97  | 43345.9                    |
| 8   | 2239.4                     | 38  | 19698.6                    | 68  | 31503.7                    | 98  | 43544.1                    |
| 9   | 2239.4                     | 39  | 19698.6                    | 69  | 31503.7                    | 99  | 43544.1                    |
| 10  | 2325.3                     | 40  | 22369.2                    | 70  | 32243.3                    | 100 | 43746.5                    |
| 11  | 2325.3                     | 41  | 22369.2                    | 71  | 32243.3                    | 101 | 43746.5                    |
| 12  | 6903.8                     | 42  | 22699.1                    | 72  | 32760.2                    | 102 | 47579.9                    |
| 13  | 6903.8                     | 43  | 22699.1                    | 73  | 32760.2                    | 103 | 47579.9                    |
| 14  | 7565.8                     | 44  | 23679.0                    | 74  | 33123.3                    | 104 | 48383.3                    |
| 15  | 7565.8                     | 45  | 23679.0                    | 75  | 33123.3                    | 105 | 48383.3                    |
| 16  | 12585.2                    | 46  | 24506.7                    | 76  | 34312.3                    | 106 | 48469.0                    |
| 17  | 12585.2                    | 47  | 24506.7                    | 77  | 34312.3                    | 107 | 48469.0                    |
| 18  | 12637.6                    | 48  | 24631.8                    | 78  | 35545.9                    | 108 | 49422.9                    |
| 19  | 12637.6                    | 49  | 24631.8                    | 79  | 35545.9                    | 109 | 49422.9                    |
| 20  | 13633.6                    | 50  | 25933.7                    | 80  | 37890.4                    | 110 | 66063.8                    |
| 21  | 13633.6                    | 51  | 25933.7                    | 81  | 37890.4                    | 111 | 66063.8                    |
| 22  | 13681.7                    | 52  | 26069.1                    | 82  | 38629.0                    | 112 | 67115.5                    |
| 23  | 13681.7                    | 53  | 26069.1                    | 83  | 38629.0                    | 113 | 67115.5                    |
| 24  | 13778.1                    | 54  | 26210.7                    | 84  | 38897.8                    | 114 | 68806.4                    |
| 25  | 13778.1                    | 55  | 26210.7                    | 85  | 38897.8                    | 115 | 68806.4                    |
| 26  | 13914.9                    | 56  | 26255.5                    | 86  | 39930.0                    | 116 | 69253.4                    |
| 27  | 13914.9                    | 57  | 26255.5                    | 87  | 39930.0                    | 117 | 69253.4                    |
| 28  | 17545.1                    | 58  | 27287.3                    | 88  | 40696.7                    | 118 | 70176.5                    |
| 29  | 17545.1                    | 59  | 27287.3                    | 89  | 40696.7                    | 119 | 70176.5                    |
| 30  | 18202.0                    | 60  | 27348.5                    | 90  | 42366.4                    |     |                            |



**Table S23** Energy levels ( $\text{cm}^{-1}$ ) of ligand field multiplets in zero field derived from CASSCF/def2-TZVP(-f) (Co, N and O atoms, def2-QZVP) computed for complex **5**

| KDs | $E/\text{cm}^{-1}$ | KDs | $E/\text{cm}^{-1}$ | KDs | $E/\text{cm}^{-1}$ | KDs | $E/\text{cm}^{-1}$ |
|-----|--------------------|-----|--------------------|-----|--------------------|-----|--------------------|
| 1   | 0.0                | 31  | 18316.7            | 61  | 24124.2            | 91  | 37779.0            |
| 2   | 98.3               | 32  | 18555.8            | 62  | 26151.6            | 92  | 37834.5            |
| 3   | 98.3               | 33  | 18555.8            | 63  | 26151.6            | 93  | 37834.5            |
| 4   | 1134.4             | 34  | 19103.7            | 64  | 28073.8            | 94  | 38442.8            |
| 5   | 1134.4             | 35  | 19103.7            | 65  | 28073.8            | 95  | 38442.8            |
| 6   | 1355.5             | 36  | 19377.4            | 66  | 28601.0            | 96  | 41491.0            |
| 7   | 1355.5             | 37  | 19377.4            | 67  | 28601.0            | 97  | 41491.0            |
| 8   | 1742.7             | 38  | 20067.3            | 68  | 28970.8            | 98  | 41920.2            |
| 9   | 1742.7             | 39  | 20067.3            | 69  | 28970.8            | 99  | 41920.2            |
| 10  | 1861.9             | 40  | 20528.8            | 70  | 29485.9            | 100 | 42214.9            |
| 11  | 1861.9             | 41  | 20528.8            | 71  | 29485.9            | 101 | 42214.9            |
| 12  | 9169.9             | 42  | 20597.9            | 72  | 30091.9            | 102 | 44521.9            |
| 13  | 9169.9             | 43  | 20597.9            | 73  | 30091.9            | 103 | 44521.9            |
| 14  | 9221.3             | 44  | 21883.4            | 74  | 30419.6            | 104 | 44676.2            |
| 15  | 9221.3             | 45  | 21883.4            | 75  | 30419.6            | 105 | 44676.2            |
| 16  | 9957.3             | 46  | 22165.3            | 76  | 31702.5            | 106 | 45029.7            |
| 17  | 9957.3             | 47  | 22165.3            | 77  | 31702.5            | 107 | 45029.7            |
| 18  | 10384.4            | 48  | 22461.3            | 78  | 32591.6            | 108 | 45132.8            |
| 19  | 10384.4            | 49  | 22461.3            | 79  | 32591.6            | 109 | 45132.8            |
| 20  | 10436.5            | 50  | 22682.8            | 80  | 34809.7            | 110 | 64697.3            |
| 21  | 10436.5            | 51  | 22682.8            | 81  | 34809.7            | 111 | 64697.3            |
| 22  | 10740.4            | 52  | 22828.2            | 82  | 35202.6            | 112 | 65053.2            |
| 23  | 10740.4            | 53  | 22828.2            | 83  | 35202.6            | 113 | 65053.2            |
| 24  | 10829.6            | 54  | 23050.8            | 84  | 35516.3            | 114 | 65442.0            |
| 25  | 10829.6            | 55  | 23050.8            | 85  | 35516.3            | 115 | 65442.0            |
| 26  | 10917.4            | 56  | 23654.3            | 86  | 36742.7            | 116 | 65811.7            |
| 27  | 10917.4            | 57  | 23654.3            | 87  | 36742.7            | 117 | 65811.7            |
| 28  | 17901.0            | 58  | 23852.9            | 88  | 37110.5            | 118 | 66216.7            |
| 29  | 17901.0            | 59  | 23852.9            | 89  | 37110.5            | 119 | 66216.7            |
| 30  | 18316.7            | 60  | 24124.2            | 90  | 37779.0            |     |                    |

**Table S24** Calculated energy levels ( $\text{cm}^{-1}$ ) and  $g$  ( $g_x$ ,  $g_y$ ,  $g_z$ ) tensors of the lowest Kramers doublets (KDs) for complexes 2-5 within ORCA/CASSCF+NEVPT2+SINGLE\_ANISO.

| KDs | 2                         |        |       | 3     |       |                           | energy / $\text{cm}^{-1}$ | levels | $g_x$ | $g_y$ | $g_z$ |
|-----|---------------------------|--------|-------|-------|-------|---------------------------|---------------------------|--------|-------|-------|-------|
|     | energy / $\text{cm}^{-1}$ | levels | $g_x$ | $g_y$ | $g_z$ | energy / $\text{cm}^{-1}$ |                           |        |       |       |       |
| 1   | 0.000                     |        | 1.482 | 2.207 | 6.494 | 0.000                     |                           | 2.360  | 3.860 | 6.336 |       |
| 2   | 70.628                    |        | 1.746 | 2.280 | 5.651 | 160.989                   |                           | 1.065  | 1.111 | 5.826 |       |
| 3   | 2020.890                  |        | 0.604 | 0.681 | 7.288 | 709.261                   |                           | 4.475  | 3.715 | 1.676 |       |
| 4   | 2141.744                  |        | 4.152 | 3.304 | 2.438 | 1013.906                  |                           | 0.094  | 0.176 | 3.750 |       |
| KDs | 4                         |        |       | 5     |       |                           | energy / $\text{cm}^{-1}$ | levels | $g_x$ | $g_y$ | $g_z$ |
|     | energy / $\text{cm}^{-1}$ | levels | $g_x$ | $g_y$ | $g_z$ | energy / $\text{cm}^{-1}$ |                           |        |       |       |       |
| 1   | 0.000                     |        | 1.632 | 2.496 | 6.672 | 0.000                     |                           | 2.077  | 3.770 | 6.039 |       |
| 2   | 83.363                    |        | 1.718 | 2.159 | 5.647 | 98.256                    |                           | 0.956  | 1.097 | 6.047 |       |
| 3   | 1400.614                  |        | 5.156 | 3.807 | 1.614 | 1134.435                  |                           | 1.780  | 3.263 | 5.972 |       |
| 4   | 1539.982                  |        | 0.465 | 0.615 | 4.692 | 1355.506                  |                           | 0.775  | 0.926 | 4.323 |       |

**Table S25** Mulliken atomic charges on the metal atoms and donor atoms in the ground state of complexes 2-5 calculated within CASSCF.

|  | atoms | 2       | atoms | 3       | 4       | 5       |
|--|-------|---------|-------|---------|---------|---------|
|  | Co    | 1.7908  | Co    | 1.2551  | 1.4821  | 1.2576  |
|  | O1    | -0.9990 | O1    | -0.9181 | -0.9744 | -0.9501 |
|  | O2    | -0.9643 | O2    | -0.9761 | -1.0212 | -0.9618 |
|  | O3    | -0.9643 | O3    | -0.9428 | -0.9975 | -0.9988 |
|  | O4    | -0.9989 | O4    | -0.9854 | -0.9571 | -0.9767 |
|  | O5    | -0.8271 | N1    | -0.7493 | -0.8074 | -0.6873 |
|  | O6    | -0.8271 | N2    | -0.7200 | -0.1388 | -0.6650 |

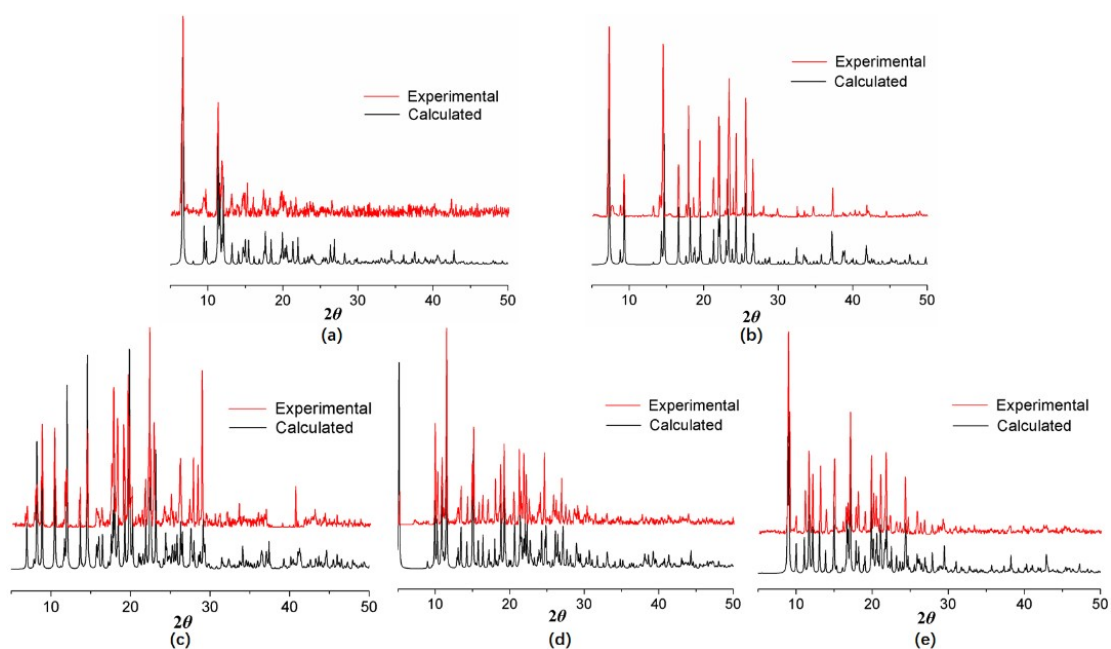

**Fig. S1** PXRD patterns for complexes **1(a)**, **2(b)**, **3(c)**, **4(d)** and **5(e)**.

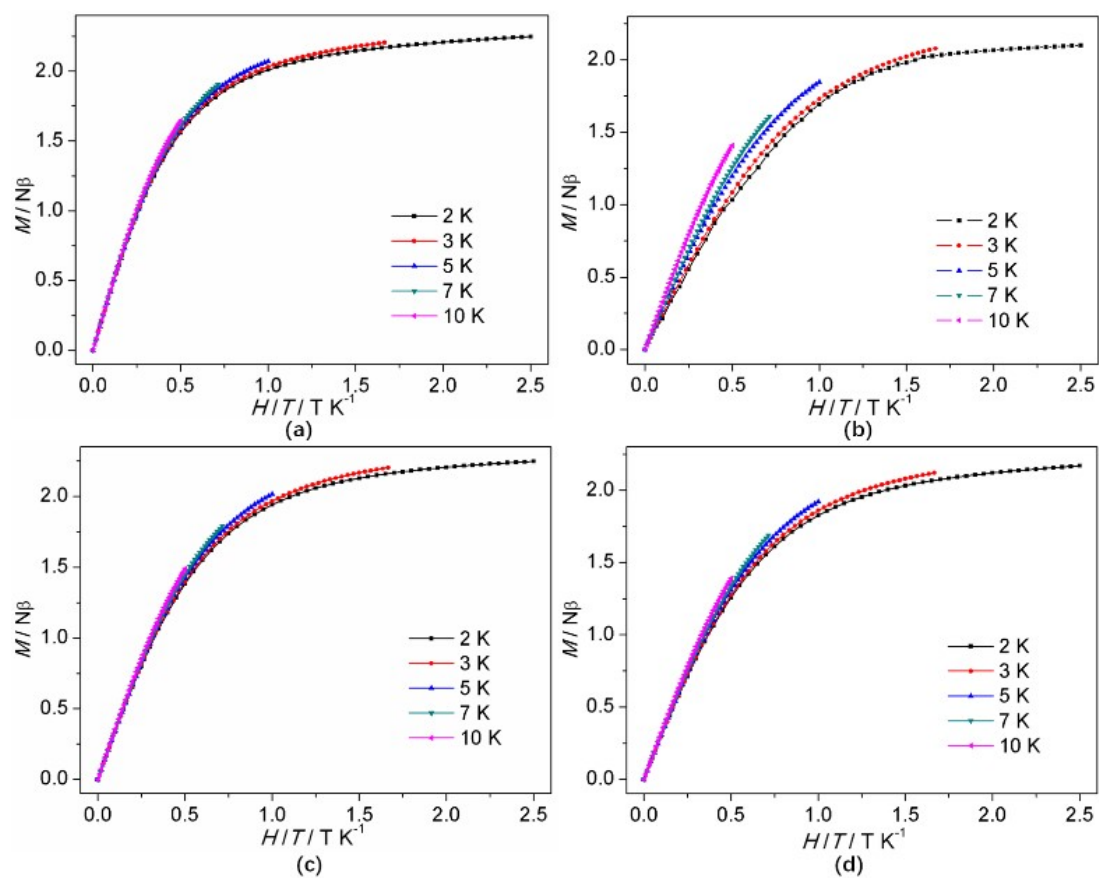

**Fig. S2** Plots of  $M$  vs  $H/T$  for **2-5** at different temperatures.

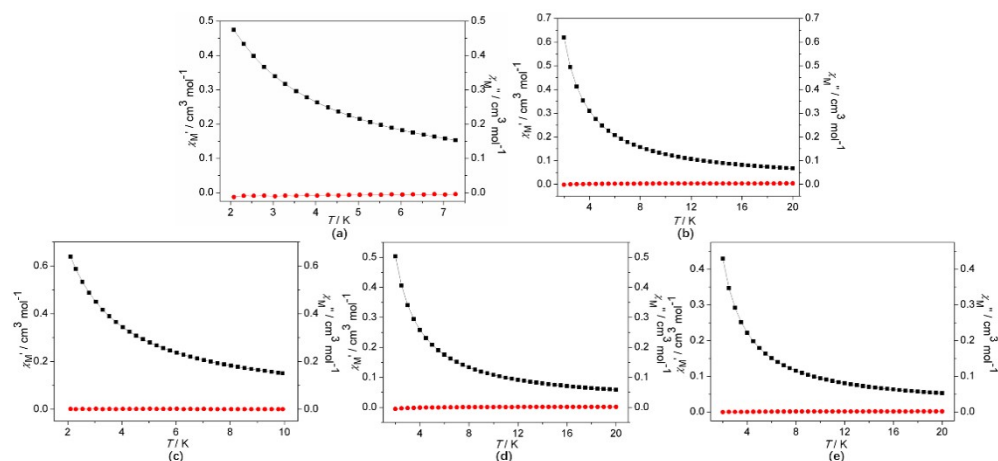

**Fig. S3** Ac magnetic susceptibility measurements for 1-5 in 0 Oe static field.

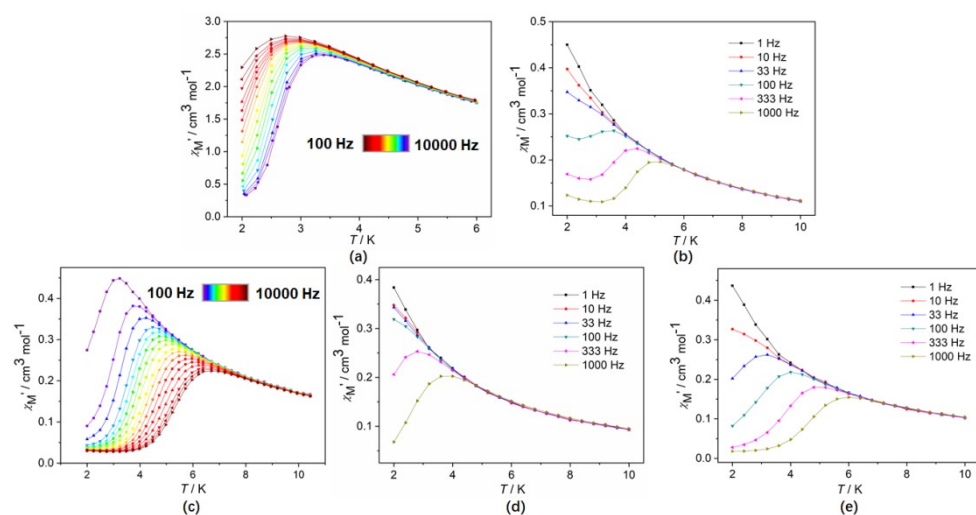

**Fig. S4** Temperature dependence of the in-phase ac susceptibilities at different frequencies with a dc field of 2000 Oe for complexes 1-5.

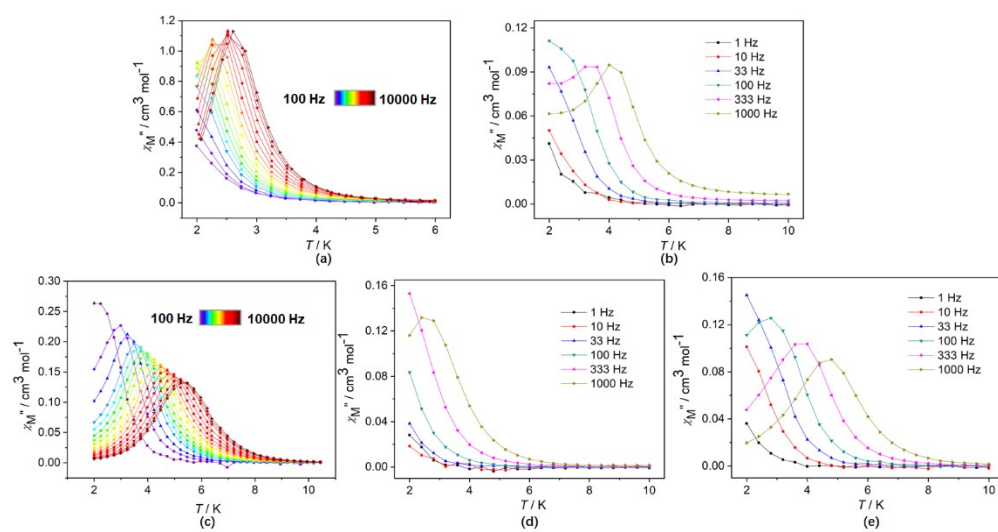

**Fig. S5** Temperature dependence of the out-of-phase ac susceptibilities at different frequencies with a dc field of 2000 Oe for complexes 1-5.

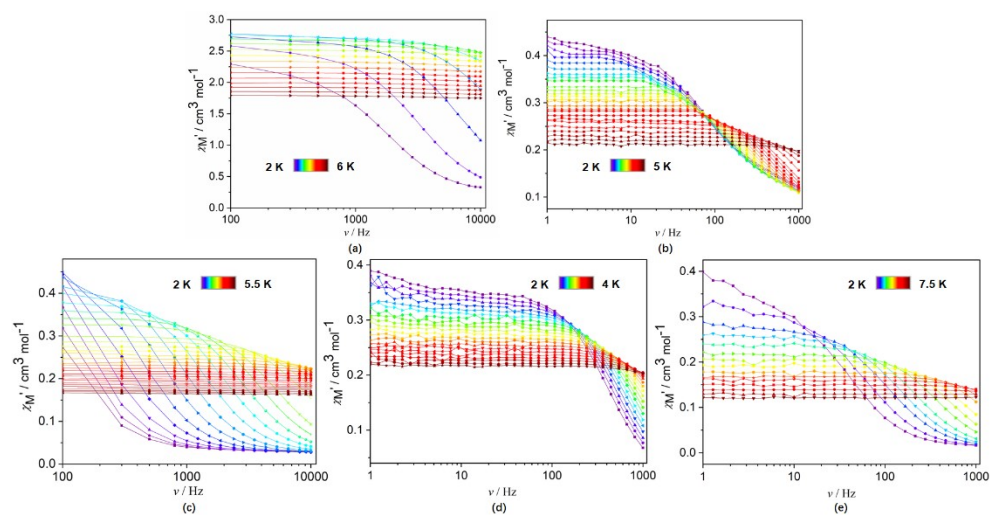

**Fig. S6** Frequency dependence of the in-phase ac susceptibility signals for complexes 1-5 under a 2000 Oe dc field.

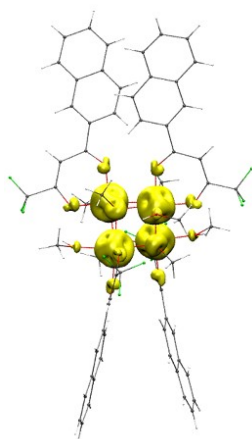

**Fig. S7** B3LYP calculated spin density for the high spin state with the cutoff values of  $0.008 e \cdot a_0^{-3}$  of complex 1.

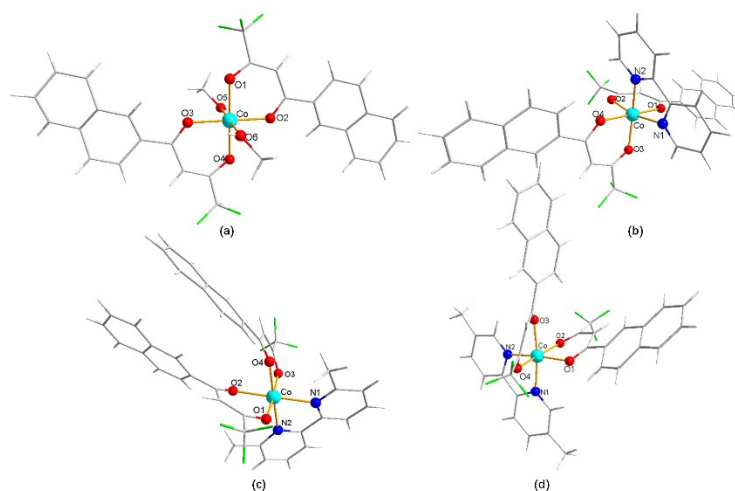

**Fig. S8** Calculated complete structure of complexes 2-5.
